# Supplementary material for: Comparative chloroplast genomics provides insights into the genealogical relationships of endangered Tetraena mongolica and the chloroplast genome evolution of related Zygophyllaceae species
Source: Frontiers journal article supplement (doi:10.3389/fgene.2022.1026919), 2022-12-08
Supplement: Data_Sheet_1.zip [file Data_Sheet_1.zip]

## Sheet: Sheet1
Table S1 Genes of analyzed species in Zygophyllaceae.
Table S1.1 Detailed genes of analyzed species in Zygophyllaceae.
Category for genes	Group of genes	Genes in T. terrestris	Genes in L. tridentata	Genes in G. angustifolium	Genes in T. mongolica	Genes in Z. mucronatum	Genes in Z. xanthoxylon
Photosynthesis related genes	Rubisco	rbcL	rbcL	rbcL	rbcL	rbcL	rbcL
	Photosystem I	psaA psaB psaC psaI psaJ (total number=5 )	psaA psaB psaC psaI psaJ (total number=5 )	psaA psaB psaC psaI psaJ (total number=5 )	psaA psaB psaC psaI psaJ (total number=5 )	psaA psaB psaC psaI psaJ (total number=5 )	psaA psaB psaC psaI psaJ (total number=5 )
	Assembly/stability of photosystem I	ycf3 ycf4	ycf3 ycf4	ycf3 ycf4	ycf3 ycf4	ycf3 ycf4	ycf3 ycf4
	Photosystem II	psbA psbB psbC psbD psbE psbF psbH psbI psbJ psbK psbL psbM psbN psbT psbZ (total number=15 )	psbA psbB psbC psbD psbE psbF psbH psbI psbJ psbK psbL psbM psbN psbT psbZ (total number=15 )	psbA psbB psbC psbD psbE psbF psbH psbI psbJ psbK psbL psbM psbN psbT psbZ (total number=15 )	psbA psbB psbC psbD psbE psbF psbH psbI psbJ psbK psbL psbM psbN psbT psbZ (total number=15 )	psbA psbB psbC psbD psbE psbF psbH psbI psbJ psbK psbL psbM psbN psbT psbZ (total number=15 )	psbA psbB psbC psbD psbE psbF psbH psbI psbJ psbK psbL psbM psbN psbT psbZ (total number=15 )
	ATP synthase	atpA atpB atpE atpF atpH atpI (total number=6 )	atpA atpB atpE atpF atpH atpI (total number=6 )	atpA atpB atpE atpF atpH atpI (total number=6 )	atpA atpB atpE atpF atpH atpI (total number=6 )	atpA atpB atpE atpF atpH atpI (total number=6 )	atpA atpB atpE atpF atpH atpI (total number=6 )
	Cytochrome b/f compelx	petA petB petD petG petL petN (total number=6 )	petA petB petD petG petL petN (total number=6 )	petA petB petD petG petL petN (total number=6 )	petA petB petD petG petL petN (total number=6 )	petA petB petD petG petL petN (total number=6 )	petA petB petD petG petL petN (total number=6 )
	Cytochrome c synthesis	ccsA	ccsA	ccsA	ccsA	ccsA	ccsA
	NADPH dehydrogenase	ndhA ndhB (×2) ndhC ndhD ndhE ndhF ndhG ndhH ndhI ndhJ ndhK (total number=12 )	ndhA ndhB (×2) ndhC ndhD ndhE ndhF ndhG ndhH ndhI ndhJ ndhK (total number=12 )	ndhA ndhB (×2) ndhC ndhD ndhE ndhF ndhG ndhH ndhI ndhJ ndhK (total number=12 )	/	/	/
Transcription and translation related genes	Transcription	rpoA rpoB rpoC1 rpoC2 (total number=4 )	rpoA rpoB rpoC1 rpoC2 (total number=4 )	rpoA rpoB rpoC1 rpoC2 (total number=4 )	rpoA rpoB rpoC1 rpoC2 (total number=4 )	rpoA rpoB rpoC1 rpoC2 (total number=4 )	rpoA rpoB rpoC1 rpoC2 (total number=4 )
	Ribosomal proteins (large subunit)	rpl2 (×2) rpl14 rpl16 rpl20 rpl22 rpl23 (×2) rpl32 rpl33 rpl36 (total number=11 )	rpl2 (×2) rpl14 rpl16 rpl20 rpl22 rpl23 (×2) rpl32 rpl33 rpl36 (total number=11 )	rpl2 (×2) rpl14 rpl16 rpl20 rpl22 rpl23 (×2) rpl32 rpl33 rpl36 (total number=11 )	rpl2 (×2) rpl14 rpl16 rpl20 rpl22 rpl23 (×2) rpl32 rpl33 rpl36 (total number=11 )	rpl2 (×2) rpl14 rpl16 rpl20 rpl22 rpl23 (×2) rpl32 rpl33 rpl36 (total number=11 )	rpl2 (×2) rpl14 rpl16 rpl20 rpl22 rpl23 (×2) rpl32 rpl33 rpl36 (total number=11)
	Ribosomal proteins (small subunit)	rps2 rps3 rps4 rps7 (×2) rps8 rps11 rps12(×2) rps14 rps15 rps16 rps18 rps19 (total number=14 )	rps2 rps3 rps4 rps7 (×2) rps8 rps11 rps12(×2) rps14 rps15 rps18 rps19 (total number=13 )	rps2 rps3 rps4 rps7 (×2) rps8 rps11 rps12(×2) rps14 rps15 rps18 rps19 (total number=13 )	rps2 rps3 rps4 rps7 rps8 rps11 rps12 rps14 rps15 rps18 rps19 (×2) (total number=12 )	rps2 rps3 rps4 rps7 rps8 rps11 rps12 rps14 rps15 rps18 rps19 (×2) (total number=12 )	rps2 rps3 rps4 rps7 rps8 rps11 rps12 rps14 rps15 rps18 rps19 (×2) (total number=12 )
RNA genes	Ribosomal RNA	rrn4.5(×2) rrn5(×2) rrn16(×2) rrn23(×2) (total number=8 )	rrn4.5(×2) rrn5(×2) rrn16(×2) rrn23(×2) (total number=8 )	rrn4.5(×2) rrn5(×2) rrn16(×2) rrn23(×2) (total number=8 )	rrn4.5 rrn5 rrn16 rrn23 (total number=4 )	rrn4.5 rrn5 rrn16 rrn23 (total number=4 )	rrn4.5 rrn5 rrn16 rrn23 (total number=4 )
	Transfer RNA	trnI-CAU trnL-CAA trnV-GAC trnI-GAU trnA-UGC trnR-ACG trnN-GUU trnL-UAG trnN-GUU trnR-ACG trnA-UGC trnI-GAU trnV-GAC trnL-CAA trnI-CAU trnP-UGG trnW-CCA trnM-CAU trnV-UAC trnF-GAA trnL-UAA trnT-UGU trnS-GGA trnfM-CAU trnG-GCC trnS-UGA trnT-GGU trnE-UUC trnY-GUA trnD-GUC trnC-GCA trnR-UCU trnG-UCC trnS-GCU trnQ-UUG trnK-UUU trnH-GUG (total number=37 )	tRNA-Ile tRNA-Leu trnV tRNA trnI tRNA trnA-UGC tRNA-Arg tRNA-Asn tRNA-Leu tRNA-Asn tRNA-Arg tRNA-Ala tRNA-Ile tRNA-Val tRNA-Leu tRNA-Ile tRNA-Pro tRNA-Trp tRNA-Met tRNA-Val tRNA-Phe tRNA-Leu tRNA-Thr tRNA-Ser tRNA-Met tRNA-Gly tRNA-Ser tRNA-Thr tRNA-Glu tRNA-Tyr tRNA-Asp tRNA-Cys tRNA-Arg tRNA-Gly tRNA-Ser tRNA-Gln tRNA-Lys tRNA-His (total number=37 )	trnI-CAU trnL-CAA trnV-GAC trnI-GAU trnA-UGC trnR-ACG trnN-GUU trnL-UAG trnN-GUU trnR-ACG trnA-UGC trnI-GAU trnV-GAC tRNA-Leu trnI-CAU trnP-UGG trnW-CCA trnM-CAU trnV-UAC trnF-GAA trnL-UAA trnT-GGU trnS-GGA trnfM-CAU trnG-UCC trnS-UGA trnT-GGU trnE-UUC trnY-GUA trnD-GUC trnC-GCA trnR-UCU trnG-UCC trnS-GCU trnN-GUU trnK-UUU trnH-GUG (total number=37 )	trnH-GUG trnI-CAU trnL-CAA trnV-GAC trnI-GAU trnA-UGC trnR-ACG trnN-GUU trnL-UAG trnL-CAA trnI-CAU trnH-GUG trnP-UGG trnW-CCA trnM-CAU trnV-UAC trnF-GAA trnL-UAA trnT-UGU trnS-GGA trnfM-CAU trnG-UCC trnS-UGA trnT-GGU trnE-UUC trnY-GUA trnD-GUC trnC-GCA trnR-UCU trnG-GCC trnS-GCU trnQ-UUG trnK-UUU (total number=33 )	trnH-GUG trnI-CAU trnL-CAA trnV-GAC trnI-GAU trnA-UGC trnR-ACG trnN-GUU trnL-UAG trnL-CAA trnI-CAU trnH-GUG trnP-UGG trnW-CCA trnM-CAU trnV-UAC trnF-GAA trnL-UAA trnT-UGU trnS-GCU trnfM-CAU trnG-UCC trnS-UGA trnT-UGU trnE-UUC trnY-GUA trnD-GUC trnC-GCA trnR-UCU trnG-GCC trnS-GCU trnQ-UUG trnK-UUU (total number=33 )	trnH-GUG trnI-CAU trnL-CAA trnV-GAC trnI-GAU trnA-UGC trnR-ACG trnN-GUU trnL-UAG trnL-CAA trnI-CAU trnH-GUG trnP-UGG trnW-CCA trnM-CAU trnV-UAC trnF-GAA trnL-UAA trnT-UGU trnS-GCU trnfM-CAU trnG-UCC trnS-UGA trnT-UGU trnE-UUC trnY-GUA trnD-GUC trnC-GCA trnR-UCU trnG-GCC trnS-GCU trnQ-UUG trnK-UUU (total number=33 )
Other genes	Maturase	matK	matK	matK	matK	matK	matK
	membrane protein	cemA	cemA	cemA	cemA	cemA	cemA
	Acetyl-CoA carboxylase gene	accD	accD	accD	accD	accD	accD
	ATP-dependent protease subunit	clpP	clpP	clpP	clpP	clpP	clpP
Genes of unknown function	Conserved reading frames	ycf1 ycf2(×2) (total number=3 )	/	/	/	/	/
Pseudogene(s)		ycf1	ycf1(×2) ycf2(×2) (total number=4 )	ycf1(×2) ycf2(×2) (total number=4 )	/
Table S1.2 Number of different categories of genes.
	T. terrestris	L. tridentata	G. angustifolium	T. mongolica	Z. mucronatum	Z. xanthoxylon
Photosynthesis related genes	48	48	48	36	36	36
Transcription and translation related genes	29	28	28	27	27	27
RNA genes	45	45	45	37	37	37
Other genes	4	4	4	4	4	4
Genes of unknown function	3	0	0	0	0	0
Pseudogene(s)	1	4	4	0	0	0
Total number of genes	130	129	129	104	104	104
Table S1.3 Number of genes.
	T. terrestris	L. tridentata	G. angustifolium	T. mongolica	Z. mucronatum	Z. xanthoxylon
Number of protein-coding genes	84	80	80	67	67	67
Number of tRNAs	37	37	37	33	33	33
Number of rRNAs	8	8	8	4	4	4
Number of pseudogene(s)	1	4	4	0	0	0
Number of total genes	130	129	129	104	104	104
Table S1.4 Number of genes in different regions.
	T. terrestris	L. tridentata	G. angustifolium	T. mongolica	Z. mucronatum	Z. xanthoxylon
LSC	84/62/22/0/0	83/61/22/0/0	82/60/22/0/0	77/56/21/0/0	77/56/21/0/0	77/56/21/0/0
SSC	13/12/1/0/0	13/11/1/0/1	12/11/1/0/0	15/5/6/4/0	15/5/6/4/0	15/5/6/4/0
IRs	33/10/14/8/1	33/8/14/8/3	35/9/14/8/4	12/6/6/0/0	12/6/6/0/0	12/6/6/0/0
Note: number of total genes/protein-coding genes/tRNAs/rRNAs/pseudogenes

## Sheet: Sheet2
Table S2 Summary of relative synonymous codon usage (RSCU) values for 6 Zygophyllaceae species.
AA	Codon	T. terrestris		L. tridentata		G. angustifolium		T. mongolica		Z. mucronatum		Z. xanthoxylon
		Count	RSCU	Count	RSCU	Count	RSCU	Count	RSCU	Count	RSCU	Count	RSCU
Phe	UUU(F)	934	1.32	695	1.39	692	1.4	503	1.45	502	1.45	493	1.44
	UUC(F)	486	0.68	304	0.61	299	0.6	192	0.55	190	0.55	194	0.56
Leu	UUA(L)	822	1.9	772	2.39	744	2.34	533	2.26	538	2.27	529	2.25
	UUG(L)	535	1.24	343	1.06	355	1.11	287	1.22	289	1.22	292	1.24
	CUU(L)	540	1.25	402	1.25	409	1.28	306	1.3	302	1.28	301	1.28
	CUC(L)	154	0.36	85	0.26	84	0.26	59	0.25	66	0.28	68	0.29
	CUA(L)	369	0.85	241	0.75	239	0.75	166	0.71	165	0.7	161	0.68
	CUG(L)	172	0.4	92	0.29	80	0.25	61	0.26	60	0.25	62	0.26
Ile	AUU(I)	1079	1.48	879	1.58	863	1.57	628	1.6	620	1.58	617	1.59
	AUC(I)	411	0.57	277	0.5	277	0.5	179	0.46	198	0.51	197	0.51
	AUA(I)	690	0.95	516	0.93	512	0.93	373	0.95	356	0.91	347	0.9
Met	AUG(M)	565	1	447	1	438	1	328	1	321	1	320	1
Val	GUU(V)	462	1.43	381	1.48	378	1.48	299	1.47	300	1.47	303	1.5
	GUC(V)	161	0.5	111	0.43	104	0.41	79	0.39	75	0.37	69	0.34
	GUA(V)	481	1.49	406	1.58	411	1.6	337	1.66	345	1.69	342	1.69
	GUG(V)	185	0.57	130	0.51	132	0.52	97	0.48	98	0.48	95	0.47
Ser	UCU(S)	561	1.76	436	1.99	414	1.9	315	1.99	309	1.95	314	1.99
	UCC(S)	289	0.91	175	0.8	184	0.85	115	0.73	117	0.74	116	0.73
	UCA(S)	393	1.23	268	1.22	274	1.26	178	1.12	168	1.06	161	1.02
	UCG(S)	174	0.55	88	0.4	89	0.41	64	0.4	69	0.44	73	0.46
	AGU(S)	387	1.21	277	1.26	269	1.24	218	1.38	218	1.38	219	1.38
	AGC(S)	111	0.35	72	0.33	74	0.34	61	0.38	68	0.43	66	0.42
Pro	CCU(P)	418	1.64	354	1.84	344	1.78	264	1.76	257	1.74	257	1.74
	CCC(P)	186	0.73	107	0.56	122	0.63	99	0.66	100	0.68	100	0.68
	CCA(P)	296	1.16	235	1.22	244	1.26	180	1.2	177	1.2	177	1.2
	CCG(P)	118	0.46	73	0.38	64	0.33	57	0.38	58	0.39	57	0.39
Thr	ACU(T)	500	1.65	439	1.88	440	1.89	309	1.74	309	1.75	306	1.74
	ACC(T)	197	0.65	127	0.54	130	0.56	125	0.7	123	0.69	122	0.69
	ACA(T)	390	1.28	293	1.25	285	1.22	233	1.31	237	1.34	235	1.33
	ACG(T)	128	0.42	75	0.32	77	0.33	43	0.24	39	0.22	42	0.24
Ala	GCU(A)	604	1.86	525	1.88	531	1.9	425	1.9	418	1.87	409	1.86
	GCC(A)	191	0.59	135	0.48	144	0.52	120	0.54	120	0.54	119	0.54
	GCA(A)	376	1.16	352	1.26	348	1.25	273	1.22	279	1.25	268	1.22
	GCG(A)	125	0.39	104	0.37	95	0.34	76	0.34	77	0.34	85	0.39
Tyr	UAU(Y)	760	1.64	579	1.69	574	1.7	415	1.69	424	1.7	417	1.68
	UAC(Y)	168	0.36	107	0.31	101	0.3	77	0.31	76	0.3	79	0.32
TER	UAA	30	1.55	31	1.63	33	1.77	23	1.68	21	1.54	22	1.61
	UAG	14	0.72	15	0.79	15	0.8	10	0.73	10	0.73	10	0.73
	UGA	14	0.72	11	0.58	8	0.43	8	0.59	10	0.73	9	0.66
His	CAU(H)	452	1.54	347	1.56	344	1.59	302	1.56	298	1.55	296	1.57
	CAC(H)	134	0.46	98	0.44	88	0.41	85	0.44	86	0.45	81	0.43
Gln	CAA(Q)	678	1.54	531	1.59	522	1.58	407	1.55	407	1.56	402	1.55
	CAG(Q)	203	0.46	137	0.41	139	0.42	117	0.45	114	0.44	118	0.45
Asn	AAU(N)	972	1.57	649	1.62	626	1.61	515	1.61	516	1.61	509	1.61
	AAC(N)	270	0.43	151	0.38	152	0.39	123	0.39	125	0.39	124	0.39
Lys	AAA(K)	1064	1.54	727	1.6	699	1.6	582	1.61	589	1.6	574	1.58
	AAG(K)	316	0.46	183	0.4	177	0.4	143	0.39	149	0.4	154	0.42
Asp	GAU(D)	826	1.61	559	1.64	560	1.65	443	1.57	434	1.54	430	1.55
	GAC(D)	201	0.39	123	0.36	120	0.35	122	0.43	131	0.46	125	0.45
Glu	GAA(E)	996	1.52	746	1.6	741	1.6	603	1.59	587	1.58	587	1.58
	GAG(E)	318	0.48	189	0.4	184	0.4	157	0.41	154	0.42	155	0.42
Cys	UGU(C)	218	1.52	167	1.63	165	1.65	118	1.63	113	1.61	115	1.62
	UGC(C)	68	0.48	38	0.37	35	0.35	27	0.37	27	0.39	27	0.38
Trp	UGG(W)	434	1	320	1	315	1	247	1	254	1	247	1
Arg	CGU(R)	336	1.39	293	1.68	272	1.58	225	1.55	228	1.57	225	1.56
	CGC(R)	94	0.39	58	0.33	65	0.38	63	0.43	59	0.41	61	0.42
	CGA(R)	340	1.4	247	1.42	250	1.45	190	1.31	195	1.35	194	1.35
	CGG(R)	88	0.36	52	0.3	56	0.32	45	0.31	48	0.33	48	0.33
	AGA(R)	434	1.79	315	1.81	313	1.82	261	1.8	254	1.75	255	1.77
	AGG(R)	163	0.67	82	0.47	78	0.45	85	0.59	85	0.59	81	0.56
Gly	GGU(G)	551	1.33	511	1.48	486	1.42	412	1.52	404	1.49	403	1.5
	GGC(G)	154	0.37	98	0.28	108	0.32	89	0.33	94	0.35	85	0.32
	GGA(G)	676	1.64	589	1.71	583	1.71	430	1.58	436	1.61	436	1.62
	GGG(G)	271	0.66	183	0.53	189	0.55	156	0.57	152	0.56	151	0.56
Total number		24733		18352		18143		14062		14048		13936

## Sheet: Sheet3
Table S3 Repeats distribution.
		T. terrestris	L. tridentata	G. angustifolium	T. mongolica	Z. mucronatum	Z. xanthoxylon
Tandem repeats		50	41	36	42	32	25
	Forward	13	18	13	5	8	6
	Reverse	4	0	1	3	0	0
Dispersed repeats	Complement	2	0	0	2	1	0
	Palindromic	8	12	9	4	7	5
	Total number of dispersed repeats	27	30	23	14	16	11
	Mono	65	65	47	75	70	61
	Di	1	5	11	6	8	12
SSRs	Tri	2	1	1	0	2	0
	Tetra	1	1	1	7	5	5
	Penta	0	0	0	0	0	0
	Hexa	0	0	0	0	0	0
	All types SSRs	69	72	60	88	85	78
1 Tandem repeats
Tribulus terrestris
No	Size(bp)	Repeat sequence	Repeat number	Start position
1	15	AAAAGAAATATTCTT	2	150
2	16	TAGAAAATATAGATAA	2	4829
3	14	TTTCTATTTATTAT	2	9213
4	16	TATAGAATGAAATTAA	2	14749
5	19	ATGCAAGTACAATAAAAAA	2	29840
6	19	CAAGTACAATAAAAAAAAA	2	29843
7	20	GTTTGATCCTATACTCACTA	2	33887
8	16	CATAAATGATTGAATC	2	35369
9	10	GAATAAAATG	2	38459
10	22	GATATTATCTACTTATCGTATA	2	39351
11	17	ATTTATATATATTATTA	2	39517
12	17	TATTATAGAAATAAAAA	2	39546
13	21	TAATTAAATAGGATAAAGGAT	2	39821
14	18	TATATTATATTTTTAATA	2	49398
15	16	TTATATATATTATTAT	3	49397
16	17	TATATTATTTTTAGATA	2	49403
17	12	ATAAATAGATAA	4	49497
18	28	ATATAAAATATAAATAAATAGATAAAAA	2	49495
19	17	ACATCAATTTAACTTAC	2	49851
20	22	ATAGAATATTCAAATAAATATT	2	49969
21	25	TTCAAATAAATATTATAGAACATAA	2	49976
22	18	ATATAGCGATATATAATG	2	50111
23	14	AAATATTTATATGA	2	51399
24	69	TCGGGATAGCTCAGTTGGTAGAGCAGAGGACTGAAAATCCTCCACCAGTTCAAATCTGGTTCCTGGCAC	2	51911
25	21	TTATAGGATAATAAATACACA	2	52684
26	15	TTCGATTTTTTATGT	2	54963
27	10	TCAAGATAAA	4	55682
28	17	CAAGATAAATCAAGATA	2	55683
29	26	TTTTTCTATTTTTTTTTGATCTAATC	2	55955
30	13	TGTAAACATGATA	2	63432
31	16	AAAAAAAATTCAAAAA	2	64769
32	32	AAAAATGACAAAAAAGAAAACATTCATTCCCC	2	64788
33	12	TTTTTCTACCCA	2	65585
34	12	GATCCCTTTACG	2	67089
35	17	ACAAATATAGTACTTAT	3	69130
36	20	TTCTTTCAATTATTAGTTTT	2	69769
37	15	TTTTATAATTTCATT	2	72788
38	13	ATTTATTTTCTTA	2	76291
39	21	TCTTTTTGTCCAAGTTATTTC	2	93012
40	18	GACCATATTGATGCTAGT	3	95453
41	14	ATAGTACCCATTTT	2	97857
42	36	TAAGGGTCGGAGAAGGGCAATCACTCATTCTGAAAA	2	108052
43	20	AATAAAAACCTAAAATCCCT	2	116501
44	14	AAGTATAATCTAGA	2	117359
45	13	CTAGTTTAAAAAG	2	118225
46	14	TTCAAAATATAATT	2	122520
47	36	TTTTCAGAATGAGTGATTGCCCTTCTCCGACCCTTA	2	138938
48	14	AAAATGGGTACTAT	2	149179
49	18	ATATGGTCACTAGCATCA	3	151549
50	21	GACAAAAAGAGAAAAAACTTG	2	154000
Larrea tridentata
No	Size(bp)	Repeat sequence	Repeat number	Start position
1	12	AATATCAATATA	5	35
2	23	AATATCAATATCAATATAATATA	2	35
3	22	AATATAAATTCAATATCAAAAT	2	54
4	17	CTATATGAAAAATATGA	2	1719
5	26	TATTTTACTTTACTTATAATTAAAAG	2	3674
6	15	TAATGAAATCAATAA	2	4660
7	16	ATTTATACTTGTTCCT	2	8824
8	20	TTTTTCCTATTCAAAGAGTC	2	12477
9	22	AAATCATTTTATTATGTTTCCA	2	14999
10	11	TTATTTCATTT	6	27981
11	15	ATATAGTTATATATA	2	29302
12	16	ATAAACATAAATCAAT	2	34210
13	13	TAATATCTAAGAA	2	34567
14	18	TTAAATTTAAAATATAAA	2	45168
15	13	TTAAAATATAGAA	2	45174
16	13	TTTGATACGTACA	2	46514
17	17	ACAGAACTTCTGTTTAT	2	50716
18	13	TATAATTATTATA	2	52846
19	15	ATAATTATTATAAAC	3	52847
20	17	CATCTAAGGACTATTCA	2	55044
21	18	TGGATGAAACAATGTTTT	2	55921
22	57	AAGAATCTTCTGATCAAGATCGTATTTCTGATCCAGAAAAACAATCTGATGAAGAGA	2	56020
23	13	TTATATATGTAAA	2	58430
24	14	ATATTATAATGATA	2	62336
25	11	ATACATATAAA	4	63718
26	19	ATATAAAATACATATAAAA	2	63722
27	15	ATATATAAATATATT	3	64362
28	15	TATATATACATATCT	3	64377
29	17	TAAAATGTCAAATATTC	2	65696
30	13	CTAATAACAAGAG	2	83619
31	17	ATGAAATGAAAATTTGG	2	84545
32	14	ATCATAATATCATC	3	99340
33	15	CTAATTTATTAATGA	2	100064
34	21	ATTGATATTAATATGGATACA	2	100104
35	14	ATTCATTATTCTTA	2	104316
36	12	AATTTTTTGATT	2	110978
37	21	TGTATCCAGACTAATATCAAT	2	117167
38	15	TCATGAATAAATTAG	2	117219
39	14	ATGATGATATTATG	3	117929
40	17	ATCCAAATTTTCATTTC	2	132733
41	13	CTCTTGTTATTAG	2	133668
Guaiacum angustifolium
No	Size(bp)	Repeat sequence	Repeat number	Start position
1	19	TTCTATATTCTATATAAAA	2	1685
2	18	TATGATAGATAATAATCT	2	4351
3	13	TGAAATAAATAAG	2	4788
4	17	TCTTTCTTTTTTATTTA	2	6870
5	19	TCTTTTTTTTTATTTTCTT	2	6870
6	15	GATTTGTATATCTAC	2	8628
7	14	TTTTATATTCATTA	2	14785
8	22	AAATAATTTTATTATGTTTCCA	2	14983
9	15	AACATAGAAATAATA	2	25471
10	21	TTATCCCTTTAATCCCATAGA	2	27684
11	12	ATATAGTTATAT	2	29211
12	29	AATAGACTCAATATTAATATAATTCAATC	2	34332
13	14	TGTATTACTGTAGT	2	45989
14	13	TTTGATACGTACA	2	46521
15	15	ACTTATTTTGATATT	2	49405
16	17	ACAGAACTTCTGTTTAT	2	50692
17	17	CATCTAAGGACTATTCA	2	54975
18	18	TGGATGAAACAATGTTCT	2	55874
19	54	CTGAGGAAGAAGAATCTTCTCTACAAGATCGTATTTCTGATCCAGAAAAAGAAT	3	55973
20	18	TCTGATCAAGAAAAAGAA	2	56062
21	56	AAGAATCTTCTCTACAAGATCGTATTTCTGATCCAGAAAAAGAATCTGATGAAGAA	3	55982
22	17	ATATTTATTTAGATATA	2	57095
23	18	TATATTTTATATTTGATA	2	63883
24	12	ATATATATATAA	3	64339
25	14	ATATCAATATATAT	4	64317
26	15	ATCAATACTTTTTGA	2	65075
27	17	TAAAATGTCAAATATTC	2	65645
28	30	GTCTTCTTCTAACTTTGATAAAGTATCTTC	2	67628
29	16	TATATATATATTTCAT	2	67947
30	13	TATTAATATTTAG	2	73049
31	15	AATGACCCCCTTCTC	2	84625
32	22	ATCATCATCATCATATCATAAT	2	98976
33	12	AATAAGAAGTAC	2	99296
34	12	TTTTTTAATTAC	3	102293
35	22	ATGATATGATGATGATGATATC	2	113327
36	15	TGAGAAGGGGGTCAT	2	127709
Tetraena mongolica
No	Size(bp)	Repeat sequence	Repeat number	Start position
1	15	TTTTTAATAATTTTC	2	4143
2	17	ATTTTATTATTGATATA	2	4179
3	17	ATAGATTACGTATCCAT	3	5318
4	13	TTTATTAAAATGA	2	7003
5	17	ATTGATTTATAATTGAT	2	26468
6	18	ATCAATTAGAATATATCT	2	30662
7	12	AAAGAAATAGAA	2	31343
8	21	ATTAGAATATTGAATGAATAT	2	35805
9	18	ATTAATATTATTGATCCT	2	48085
10	13	TATTACATTATTA	8	48224
11	38	ATTATATTAATATATTATTAATATATTAATATAAATTA	2	48257
12	16	AATGGAGTAAGACATA	2	48957
13	16	TATATCATTATATATC	2	51754
14	15	ATTTCAGTATATCTA	2	51864
15	11	TATTTATTAGC	2	53911
16	11	AAATAAATTAA	2	54155
17	15	TGAAAATCCTAGTGA	2	54333
18	15	TATTATCAATTACTC	3	55840
19	29	AATTTTATATTATCAATTACTCTATTATC	2	55833
20	17	TTATCTAATAGATTATT	2	61322
21	13	AAATATAATTATT	2	61407
22	23	TAGATTATTTGAAATAGATTATT	2	64151
23	41	TTCATATTAATAATTTATAATATAATATTATAATATAATAT	2	64249
24	23	TTCATATTAATAATTTATAATAT	3	64249
25	13	ATAATATTATAAT	5	64258
26	26	AATTGATATCTACAAATATAAATATA	2	64373
27	26	AAATATAAATATAAATTGATAAAAAA	2	64386
28	16	AAAAAAAAATAAGAAT	2	65765
29	17	AGATTACCATATACAAC	2	76454
30	26	ATCTATACATATATAGACTATCTATT	2	77025
31	17	ATATTATTTCTATAACT	2	84964
32	15	GAATACTAAATAGTA	2	85136
33	22	TTCATTTACTTGAACTTGTCAT	2	86416
34	13	AAAAAATAAAATG	2	86756
35	13	TAATAACTAATAT	2	99066
36	16	ATAAAAATATATAAAA	2	99147
37	14	TATAATTATATTAT	5	99233
38	17	TATATTACTTATTATAT	2	99263
39	30	TTTTATAAAAAATAAATCTCATTTCTTTTA	2	99717
40	14	TTATAAAATATTA	3	101292
41	11	ATTATTATAAA	3	101302
42	21	AAATAAAATTAGGAAATAAAG	2	101402
Zygophyllum mucronatum
No	Size(bp)	Repeat sequence	Repeat number	Start position
1	128	GAAATCATTTCAATTTTTTGACGTTTCTATCTTAGAAATGAAATCTTTTTGATATCGATATTGGGTTAGGGAAAAGATTCAATAAAAAAAACGAAGACTATTACTTAATTTTAATGATATTTTAATGA	2	37
2	21	CTTAATTCTATTTTTAATATT	2	4378
3	18	TATATATCTATTTTTATT	6	5400
4	16	TTCTTAATTATAATTA	2	6230
5	15	ATATATATAATATAT	2	7408
6	13	CCAGAGAATAGAG	2	29129
7	18	ATCAATTAGAATATATCT	2	30447
8	129	ATAAAGAAAAAAAAATAGATTTATCAAGCAAAAGGAGAGAGAGGGATTCGAACCCTCGATAGTAAACTATACCGGTTTTCAAGACCGGAGCCATCAACCACTCGGCCATCTCTCCAAAATAGAATTTAT	2	34294
9	131	GATTGGGTAAAAAAAAATGACCTGTACCCGTGTTGGAATAAAATAGAAAAAATGCGGTCTTAATTCATCTAGAATCAACGAATTCATGGTAAAATGTAAAAACCCCCACGATGTATTTGATTCACATTTTT	2	34704
10	21	TTTATCTTGTAGGAATTCATA	2	44400
11	24	TATATTTATATGATTATATATC	2	51748
12	13	TTTAGATTTTGGA	2	59906
13	20	ACTTACTTAATTAAAGAAAG	2	60571
14	19	TAGATTCTAATATATGATA	2	64263
15	20	TTTACTAGTTTACTAGTCTA	2	65494
16	12	TATATCCTAGAA	2	75919
17	15	CAATCTAATAATAGA	2	84193
18	25	TATTATGTCTTGAATCTTAATAGAT	2	84332
19	15	AATTATATATAAATTG	2	84852
20	13	CATACATATTTTT	2	84906
21	14	TCTTATTTATTCTT	2	86471
22	52	TAATAAAGACAAGATACACTTGAACCACAGAAAACAAAACCAGAATCAACAA	2	86577
23	12	AATCTAAGTCTG	2	87156
24	10	AACTAATAAA	5	98558
25	26	ATCTAATAACTAATAAAAACTAATAA	2	98551
26	36	TAATAACTAATAAAAAGAATAAATAATACTAA	2	98554
27	26	AATAACTAATAAAAACTAATAAAAAG	2	98555
28	15	ATAATTATAATAAAA	3	98639
29	24	TATAATAAAAAGAAAATACAACTA	2	98673
30	16	TATGAAAGCCTTTCTC	2	100675
31	15	TCTATTATTAGATTG	2	100942
32	16	ATATTTCTTATTGAAT	4	101023
Zygophyllum xanthoxylon
No	Size(bp)	Repeat sequence	Repeat number	Start position
1	18	ATTAACTAAAAAATAAGA	2	4260
2	12	CTAATATTCTTA	4	4352
3	29	TACATCATTCTAATATTCTTACTAATATT	2	4343
4	35	ATTAATATTCATTTTATGATTCTTAATGGATCTTT	2	5306
5	26	TATATAATAGATTATATAATTCTTTA	2	5461
6	11	TAAATATAATT	2	5768
7	18	TTATTCAAAATAACCTAT	2	5987
8	21	TAAATATAATTTAGAATATAAT	2	6131
9	14	ATTTATTATCACAT	2	7408
10	26	ATTCAATTATATAGAATATAAATTCT	2	7737
11	18	ATCAATTAGAATATATCT	2	30995
12	17	CTATATATCTATATGAT	2	51909
13	20	ACTTACTTAATTAAAGAAAG	2	60670
14	17	CATATAATATAATACAA	2	63302
15	16	TTGAAGTATATACTTG	2	83873
16	12	ATTCAATAATAA	2	84452
17	12	ATTATAATATAG	2	84962
18	23	TTATATTATATATATAAATATAGA	3	85213
19	17	ATATATATAATAATAGA	2	85244
20	18	ATATATATATAATAATAG	3	85224
21	20	TAATGTTTGTTAACTATAAT	2	88399
22	25	TTTTTTTTTTAAGTACTAAGAATCA	2	90795
23	10	ATTATTATAG	3	101160
24	12	AATTTATTATTG	2	101588
25	16	CAAGTATATACTTCAA	2	102162
2 Dispersed repeats
Tribulus terrestris
No	Type	Repeat sequence	Size(bp)	PositionA	PositionB
1	F	AATGTACTTATTCGATCGAATAAGTACCTT	30	113898	133136
2	F	TATACTATTATTATGATATTACATATTTCA	30	28905	28936
3	F	CACCAGTTCAAATCTGGTTCCTGGCACTCG	30	51957	52026
4	F	GACCGTATTGATGCTAGTGACCATATTGAT	30	95453	95489
5	F	TGAGATTTTCACCTCATACGGCTCCTCGTT	30	102801	124638
6	F	ATCGATATCGTCACTAGCATCAATATGGTC	30	151545	151581
7	F	TGTTCAACTCTTTGACAACACGAAAAAGCCA	31	111651	111683
8	F	GGTTTTTCATGTTGTCAAAGAGTTGAACAAT	31	135352	135384
9	F	AAACGGAAAGAGAGGGATTCGAACCCTCGGTA	32	9028	38169
10	F	TCGGGATAGCTCAGTTGGTAGAGCAGAGGACTGAAAATCCTC	42	51911	51984
11	F	TTACAGAACCGTACGTGAGATTTTCATTTCATACGGCTCCTC	42	47138	124623
12	F	TACAGAACCGTACATGAGATTTTCACCTCATACGGCTCCTCG	42	102787	124624
13	F	AAAACAAATGCAATAGCTAAATGATGGTGTGCAATATCAGTCAGCCATA	49	42003	44227
14	R	TTTTTTTATTTTTAATTTAAGTAAATATAA	30	481	122479
15	R	TTTTAAATTAATTTCTTTTTTTTTTTTTTC	30	39082	62772
16	R	AAGAATGAATAAAGATGAATAAAGAAAAAA	30	76386	144140
17	R	AATTGTTTTTTTTTTTTTTTTTCTAAGAATA	31	33659	62762
18	C	AAGAATGAATAAAGATGAATAAAGAAAAAA	30	76386	102894
19	C	AAAAAAAAATAAAGTAAAAAGTAAATAAAAAA	32	9299	85586
20	P	ACGGAAAGAGAGGGATTCGAACCCTCGGTA	30	9030	48466
21	P	CATTCTAATAACAATAATGGATAGTATGGT	30	31108	31162
22	P	AGGGAGAGAGAGGGATTCGAACCCTCGATA	30	38171	48466
23	P	TGAGATTTTCACTTCATACGGCTCCTCGAG	30	124638	144233
24	P	TGTTCAACTCTTTGACAACACGAAAAAGCCA	31	111651	135350
25	P	TGTTCAACTCTTTGACAACATGAAAAACCAA	31	111683	135382
26	P	TACAGAACCGTACGTGAGATTTTCATTTCATACGGCTCCTC	41	47139	144236
27	P	TACAGAACCGTACGTGAGATTTTCACTTCATACGGCTCCTCG	42	124624	144235
Larrea tridentata
No	Type	Repeat sequence	Size(bp)	PositionA	PositionB
1	F	ATTGATTGATAATCACAATTTCATTTCTAT	30	133596	133802
2	F	CAATATCAAGAAAGATTCAAAGAAACATCA	30	83577	83651
3	F	GTTTCTTTGAATCTTTCTTGATATTGAAAT	30	133636	133710
4	F	ATCATCCAGAAATATTCTAATATAAAGAAC	30	83542	83603
5	F	TATTAGAATATTTCTGGATGATGTTTCTTT	30	133688	133749
6	F	TACATGAGATTTTCACCTCATACGGCTCCTC	31	42382	89467
7	F	TTCCATTTCAATAGCTCGGATCGAATCGGTA	31	84865	132388
8	F	TATTGATTCGATCCGAGCTATTGAAATGGAA	31	84894	132417
9	F	AACGGAAAGAGAGGGATTCGAACCCTCGGTA	31	6612	33199
10	F	TTTATTAATGAAATGCGGTAGATTCATATTAGT	33	99981	100083
11	F	ACTAATATCAATCTAACCCATTTCATTAATAAA	33	117197	117299
12	F	TGAAATGAAATTGTGATTATCAATCAATGTAATTGA	36	83484	83690
13	F	TTCAATTAGATTGATTGATAATCACAATTTCATTTC	36	133587	133793
14	F	GCAATAGCTAAATGGTGATGTGCAATATCAGTCAGCCATA	40	37129	39362
15	F	TACAGAACCATACATGAGATTTTCACCTCATACGGCTCCTC	41	89456	110630
16	F	CTACAGAACCGTACATGAGATTTTCACCTCATACGGCTCCTC	42	42371	89455
17	F	TACAGAACCGTACATGAGATTTTCACCTCATACGGCTCCTCC	42	42372	110630
18	F	CAAGATCGTATTTCTGATCCAGAAAAACAATCTGATGAAGAGAAAGA	47	56034	56091
19	P	ACGGAAAGAGAGGGATTCGAACCCTCGGTA	30	6613	43638
20	P	AAAAACCCATATTTCAAAGTAAGGTACAAA	30	107429	107466
21	P	ATGTGCCTCTTTACCATTCTCTAAAAATAG	30	35224	35260
22	P	AAGGAGAGAGAGGGATTCGAACCCTCGATA	30	33200	43638
23	P	AAAAAAAAAAAGAAAGAATAAAAAAAATGA	30	67795	76682
24	P	TACATGAGATTTTCACCTCATACGGCTCCTC	31	42382	127816
25	P	GCCATCAACCACTCGGCCATCTCTCCAAAAT	31	33263	43575
26	P	TATACATATTACATATTATATATGTGATAAT	31	52895	56880
27	P	TTTATTAATGAAATGCGGTAGATTCATATTAGT	33	99981	117197
28	P	TTTATTAATGAAATGGGTTAGATTGATATTAGT	33	100083	117299
29	P	TACAAAACCGTACATGAGATTTTCACCTCATACGGCTCCTC	41	110630	127816
30	P	CTACAGAACCGTACATGAGATTTTCACCTCATACGGCTCCTC	42	42371	127816
Guaiacum angustifolium
No	Type	Repeat sequence	Size(bp)	PositionA	PositionB
1	F	TTCATTCCGAATTCTTGAATTCGGAATGAA	30	98577	113758
2	F	TACATGAGATTTTCACCTCATACGGCTCCTC	31	42428	88773
3	F	TACATGAGATTTTCACCTCATACGGCTCCTC	31	88773	109724
4	F	AACGGAAAGAGAGGGATTCGAACCCTCGGTA	31	6708	33134
5	F	ATAAATCAATGTATATGTATAAATATATATAT	32	34072	64329
6	F	TATTTGTCTTCTTCTAACTTTGATAAAGTATC	32	67623	67683
7	F	GCAATAGCTAAATGATGATGTGCAATATCAGTCAGCCATA	40	37106	39339
8	F	CAAGATCGTATTTCTGATCCAGAAAAAGAATCTGAGGAAGA	41	55996	56050
9	F	CAAGATCGTATTTCTGATCCAGAAAAAGAATCTGAGGAAGA	41	55996	56107
10	F	TACAGAACCATACATGAGATTTTCACCTCATACGGCTCCTC	41	88763	109714
11	F	TACAGAACCGTACATGAGATTTTCACCTCATACGGCTCCTCC	42	42418	109714
12	F	CTACAGAACCGTACATGAGATTTTCACCTCATACGGCTCCTC	42	42417	88762
13	F	AAGAATCTTCTGATCAAGATCGTATTTCTGATCCAGAAAAAGAATCTGA	49	55982	56093
14	R	TATATATATAAATATTATATATATATATAA	30	12	69178
15	P	ACGGAAAGAGAGGGATTCGAACCCTCGGTA	30	6709	43689
16	P	AAAAACCCATATTCAAAAGTCAAGTACAAA	30	106499	106536
17	P	ACTCTTTCTTTTTTTTCTTGTATTATTTAT	30	56789	56841
18	P	AAGGAGAGAGAGGGATTCGAACCCTCGATA	30	33135	43689
19	P	TACATGAGATTTTCACCTCATACGGCTCCTC	31	42428	123561
20	P	TACATGAGATTTTCACCTCATACGGCTCCTC	31	109724	123561
21	P	GCCATCAACCACTCGGCCATCTCTCCAAAAT	31	33198	43626
22	P	TACAGAACCGTACATGAGATTTTCACCTCATACGGCTCCTC	41	109714	123561
23	P	CTACAGAACCGTACATGAGATTTTCACCTCATACGGCTCCTC	42	42417	123561
Tetraena mongolica
No	Type	Repeat sequence	Size(bp)	PositionA	PositionB
1	F	TCAAAGAAATTAAAAAAAAAAAAAGATTAT	30	1481	87734
2	F	TTATCTAATAGATTATTTCTAAAATCTTCT	30	61339	84887
3	F	AAAGGAAAGAGAGGGATTCGAACCCTCGGTA	31	6488	34606
4	F	GCAATAGCCAAATGATGATGTGCAATATCAGTCAGCCATA	40	38280	40504
5	F	TTCATATTAATAATTTATAATATAATATTATAATATAATAT	41	64249	64290
6	R	AAAGGATAAGCGTTTTTTTTTTTTTTTTCT	30	80341	80903
7	R	TTTCCTATTTACAAAAAAGAAAAAAAAAGA	30	105579	106141
8	R	AATTTATAATATAATATTATAATATAATATTTCATA	36	64260	64299
9	C	AAAGGATAAGCGTTTTTTTTTTTTTTTTCT	30	80341	105579
10	C	TCTTTTTTTTTCTTTTTTGTAAATAGGAAA	30	80903	106141
11	P	AAAAATAAAATGAATTTATTACATTACACA	30	6589	44870
12	P	AAGGAGAGAGAGGGATTCGAACCCTCGATA	30	34607	44870
13	P	TTTTTTTTTTTTATTTTAAATTTTAAAAATA	31	4467	10532
14	P	CTACAGAACCGTACATGAGATTTTCACCTCATACGGCTCCTC	42	43400	99904
Zygophyllum mucronatum
No	Type	Repeat sequence	Size(bp)	PositionA	PositionB
1	F	TAGTTATAATAAAAAAAATTATAATAAATA	30	3675	98654
2	F	AAAGTTTTTTTTTTTTTTTATTTTTAATTA	30	26646	61742
3	F	AGAGGAAAGAGAGGGATTCGAACCCTCGGTA	31	6806	34324
4	F	AGAGGAAAGAGAGGGATTCGAACCCTCGGTA	31	6806	34453
5	F	AGATATATCTGTATTTTTCTTATGTTATTACTTCATAA	38	7514	7619
6	F	GCAATAGCCAAATGATGGTGTGCAATATCAGTCAGCCATA	40	38319	40543
7	F	GAAATCATTTCAATTTTTTGACGTTTCTATCTTAGAAATGAAATCTTTTTGATATCGATATTGGGTTAGGGAAAAGATTCAATAAAAAAAACGAAGACTATTACTTAATTTTAATGATATTTTAATGAG	129	165	105123
8	F	GCCCCGTTCCGTTACTATTTGGATTTGATTTCTTTTGAAATCATTTCAATTTTTTGACGTTTCTATCTTAGAAATGAAATCTTTTTGATATCGATATTGGGTTAGGGAAAAGATTCAATAAAAAAAACGAAGACTATTACTTAATTTTAATGATATTTTAATGAG	165	1	105087
9	C	ATTTTTAATAATTAAAAAAAAAAAAAAGAA	30	10903	78599
10	P	AAGGAGAGAGAGGGATTCGAACCCTCGATA	30	34325	44808
11	P	AAGGAGAGAGAGGGATTCGAACCCTCGATA	30	34454	44808
12	P	ACCACAGAAAACAAAACCAGAATCAACAATA	31	86600	86690
13	P	GGAAAGAGAGGGATTCGAACCCTCGGTACGAAAAA	35	6809	44801
14	P	CTACAGAACCGTACATGAGATTTTCACCTCATACGGCTCCTC	42	43359	99077
15	P	GAAATCATTTCAATTTTTTGACGTTTCTATCTTAGAAATGAAATCTTTTTGATATCGATATTGGGTTAGGGAAAAGATTCAATAAAAAAAACGAAGACTATTACTTAATTTTAATGATATTTTAATGAG	129	165	79913
16	P	GCCCCGTTCCGTTACTATTTGGATTTGATTTCTTTTGAAATCATTTCAATTTTTTGACGTTTCTATCTTAGAAATGAAATCTTTTTGATATCGATATTGGGTTAGGGAAAAGATTCAATAAAAAAAACGAAGACTATTACTTAATTTTAATGATATTTTAATGAGA	166	1	79912
Zygophyllum xanthoxylon
No	Type	Repeat sequence	Size(bp)	PositionA	PositionB
1	F	AACGGAAAGAGAGGGATTCGAACCCTCGGTA	31	7213	34845
2	F	CGAAGACTATTACTTAATTTACTTCATTTTAATGA	35	1	105767
3	F	GCAATAGCCAAATGATGATGTGCAATATCAGTCAGCCATA	40	38537	40761
4	F	TTAAATATAATTTAGAATATAAACTCAAATATTAAATAATAATAT	45	5778	6151
5	F	TTATTCAAAATAACCTATTTATTTTATGAAACATAATCATTTTCGATAAAATAGATTAAAATAAATTACGTATCCATTAGATTAGATTCTAATAATTAATAAATTCTTTATTGCAAAGCAAACTTCTAAATATAATTTAAATATAATT	148	5642	6005
6	F	ATATAATTCTTTATATATAATAGATATATATATTCTTTTCTATTTTCTATATTATTTGTATATATATCTATTTTGATCTATTTTGATTGATGAAAACGTTCAATTTCACATTAGTATACTTTCTTTAATCTTCTTTATTTTCTTTGAAAATTCAATCTATTTATCTTATTATTCAAAATAACCTATTTATT	191	5474	5819
7	P	AAGGAGAGAGAGGGATTCGAACCCTCGATA	30	34846	45037
8	P	TTTATGTCACCAAATCAATTTTTTATTCAA	30	56051	56082
9	P	CGAAGACTATTACTTAATTTACTTCATTTTAATGA	35	1	80264
10	P	GGAAAGAGAGGGATTCGAACCCTCGGTACAAAAAAC	36	7216	45030
11	P	CTACAGAACCGTACATGAGATTTTCACCTCATACGGCTCCTC	42	43604	99502
Note: F=Forward repeat; R=Reverse repeat; C=Complement repeat; P=Palindromic repeat
3 SSRs
Tribulus terrestris
No	Repeat motif	Repeat number	Start position
1	A	10	4185
2	A	11	4785
3	A	10	4943
4	A	10	5040
5	A	14	5205
6	A	10	8400
7	A	10	9668
8	A	13	11430
9	T	11	144847
10	A	12	17932
11	T	11	131617
12	T	10	130954
13	T	14	129884
14	A	11	28985
15	T	14	129125
16	A	10	32092
17	T	13	125544
18	A	11	34930
19	A	10	34980
20	T	10	122502
21	T	11	117948
22	T	10	117341
23	T	10	117282
24	A	19	47814
25	A	14	50589
26	T	10	106909
27	T	10	102918
28	A	10	60353
29	A	13	64780
30	T	10	88884
31	T	11	86728
32	T	11	86275
33	T	11	84947
34	T	10	84434
35	A	12	82187
36	T	14	75040
37	T	11	72628
38	T	12	70313
39	T	13	67402
40	T	14	64364
41	T	11	63316
42	T	18	62773
43	T	13	58165
44	T	12	58087
45	A	11	102206
46	T	10	55102
47	T	22	54091
48	T	11	53309
49	T	10	52234
50	T	17	49612
51	T	10	46800
52	AT	6	117330
53	AAT	4	117738
54	T	14	39097
55	T	10	34272
56	T	17	33664
57	T	10	27949
58	T	15	20208
59	A	10	140145
60	T	13	14407
61	A	10	144136
62	T	12	13757
63	ATTT	3	10671
64	T	10	8066
65	ATT	4	7944
66	T	15	5700
67	T	13	1903
68	T	15	19
69	A	10	158170
Larrea tridentata
No	Repeat motif	Repeat number	Start position
1	A	11	1827
2	A	10	3742
3	A	10	6308
4	T	10	129499
5	A	16	10381
6	A	10	12077
7	A	10	14901
8	AT	5	18332
9	T	10	116530
10	T	11	114966
11	A	11	21388
12	T	10	111838
13	T	10	111806
14	T	11	110729
15	T	11	108546
16	T	13	105871
17	T	13	103097
18	A	10	34431
19	A	12	35027
20	A	10	41086
21	T	11	93573
22	AT	8	44678
23	A	10	45655
24	A	15	46909
25	A	11	47377
26	T	11	80936
27	A	12	57152
28	A	12	57601
29	T	12	78167
30	T	11	77150
31	CTTT	3	76696
32	A	10	60645
33	T	11	74146
34	AT	5	63748
35	AAG	4	64431
36	A	15	64539
37	T	15	68661
38	A	12	67794
39	T	10	67628
40	AT	5	68790
41	T	11	64659
42	A	10	72514
43	A	13	73644
44	T	15	62235
45	T	11	60703
46	T	14	56781
47	T	13	52790
48	T	14	52695
49	T	10	52614
50	A	10	87804
51	T	13	46946
52	T	11	46115
53	T	11	44827
54	T	11	41473
55	T	10	41394
56	A	12	104371
57	AT	6	105638
58	T	10	30056
59	T	13	26028
60	T	11	25863
61	A	13	111272
62	T	10	24661
63	A	11	111879
64	T	10	17487
65	T	10	16777
66	T	12	13679
67	A	11	123729
68	T	15	11101
69	T	11	7287
70	T	14	7095
71	T	10	6776
72	T	12	6523
Guaiacum angustifolium
No	Repeat motif	Repeat number	Start position
1	AT	6	9
2	AT	6	28
3	AT	6	52
4	A	12	1647
5	A	10	3894
6	A	10	4493
7	A	11	10408
8	A	10	12070
9	AT	5	18298
10	T	12	110694
11	T	10	110662
12	T	11	110596
13	A	10	21365
14	T	10	104951
15	AT	5	34094
16	A	11	35008
17	T	10	89777
18	AT	5	41970
19	AT	7	44693
20	T	12	81660
21	T	10	79779
22	T	11	79569
23	T	11	78169
24	T	11	77533
25	A	12	56855
26	A	10	57190
27	A	10	57619
28	T	11	71621
29	T	12	67825
30	CTTT	3	67571
31	AT	6	64337
32	AT	5	64351
33	A	10	67785
34	AT	6	67946
35	A	10	68206
36	T	10	62293
37	AT	5	69198
38	T	10	60718
39	T	10	52587
40	T	10	50140
41	T	11	46121
42	T	12	42481
43	ATT	5	34468
44	T	10	29644
45	T	10	29399
46	T	11	27301
47	T	10	26661
48	A	11	104689
49	T	10	26056
50	T	10	24648
51	T	10	17459
52	T	13	16922
53	T	10	16749
54	T	10	16525
55	T	13	10973
56	A	10	122578
57	T	10	6615
58	T	10	5012
59	T	10	174
60	A	12	130693
Tetraena mongolica
No	Repeat motif	Repeat number	Start position
1	A	13	1492
2	A	10	1672
3	A	10	4297
4	A	12	4447
5	A	10	5876
6	AAAT	3	6802
7	A	16	8736
8	A	18	10546
9	T	15	90095
10	T	14	89381
11	T	12	88013
12	AT	5	18550
13	A	10	21244
14	AAAT	3	21667
15	AT	5	25736
16	A	13	25759
17	T	16	80353
18	T	10	78123
19	T	11	77083
20	T	13	76247
21	A	17	30313
22	T	12	72927
23	T	10	72628
24	A	10	34849
25	A	12	34860
26	A	10	35559
27	AT	5	35911
28	T	10	65723
29	T	11	64928
30	A	10	43540
31	T	16	61545
32	AT	5	46085
33	A	11	46232
34	A	12	47278
35	A	10	47789
36	GATT	3	55895
37	T	12	52187
38	T	15	51530
39	T	10	51444
40	A	12	56058
41	A	12	56197
42	AT	5	56376
43	A	10	56527
44	T	11	48715
45	T	11	48491
46	T	11	46710
47	AAAG	3	59814
48	T	13	45006
49	T	11	43093
50	A	13	63649
51	A	11	64127
52	A	11	64469
53	A	10	65026
54	A	13	67242
55	AT	6	68198
56	T	12	36263
57	A	16	70099
58	AAAT	3	71513
59	T	10	31403
60	ATTT	3	31226
61	T	14	30494
62	A	10	75983
63	T	10	29551
64	A	11	77538
65	T	10	26060
66	A	10	86752
67	A	14	87744
68	T	11	17710
69	T	11	17177
70	A	10	88988
71	T	12	16998
72	A	12	90538
73	ACCT	3	92436
74	T	14	11948
75	T	12	11457
76	T	11	11347
77	T	11	11257
78	T	14	8889
79	A	13	98134
80	A	13	98628
81	T	11	7137
82	A	10	99117
83	T	15	6646
84	T	14	6402
85	T	17	6170
86	T	12	4467
87	T	13	3816
88	A	16	106143
Zygophyllum mucronatum
No	Repeat motif	Repeat number	Start position
1	AACT	3	1622
2	A	12	1738
3	A	10	1921
4	T	11	100879
5	A	10	4628
6	A	10	4645
7	AT	5	5397
8	A	12	6751
9	A	10	7077
10	A	10	7248
11	AT	7	7417
12	AT	5	7432
13	A	13	7443
14	A	10	7702
15	A	10	9185
16	A	14	10916
17	T	11	90452
18	A	11	15085
19	T	11	89000
20	AT	5	18740
21	T	10	81426
22	T	12	80528
23	AT	5	25923
24	T	14	78612
25	ATTT	3	78603
26	T	10	78214
27	A	10	27550
28	T	13	76727
29	T	11	76025
30	A	10	31394
31	AT	7	34550
32	AT	5	35823
33	AAT	4	35857
34	T	10	68301
35	T	10	67477
36	T	11	67379
37	T	10	67120
38	T	10	65613
39	T	10	63902
40	T	10	62543
41	T	11	59471
42	A	11	46036
43	A	10	46842
44	A	13	47325
45	A	10	47832
46	T	11	57377
47	T	12	54176
48	T	10	52180
49	T	11	51523
50	A	12	54200
51	T	10	48699
52	T	13	47947
53	A	12	60122
54	AAAG	3	60251
55	T	10	43019
56	T	13	42457
57	A	10	66427
58	A	10	68269
59	T	10	36294
60	A	11	72372
61	ATTT	3	30948
62	A	10	75766
63	T	10	28545
64	T	12	28279
65	A	10	77193
66	T	10	27506
67	T	15	26650
68	T	10	25122
69	A	11	84275
70	T	13	17370
71	T	12	17197
72	ACCT	3	91883
73	T	14	13032
74	T	11	11492
75	A	10	94995
76	ATT	4	7719
77	AT	5	98543
78	T	11	6514
79	A	11	98972
80	A	13	100768
81	T	13	4427
82	T	10	4058
83	T	11	1808
84	A	10	103729
85	A	12	104625
Zygophyllum xanthoxylon
No	Repeat motif	Repeat number	Start position
1	A	10	1491
2	A	10	3454
3	A	10	4623
4	AT	5	5497
5	T	11	100107
6	AT	5	5842
7	A	10	6517
8	A	11	7519
9	A	12	7946
10	A	10	9218
11	A	12	11186
12	A	13	13620
13	T	10	90820
14	T	11	90794
15	A	12	15384
16	T	10	89532
17	AT	5	19044
18	T	10	85625
19	T	12	81752
20	T	10	80860
21	AT	5	26219
22	T	12	78575
23	T	10	76245
24	AT	5	29594
25	A	10	30580
26	A	10	31977
27	T	10	73041
28	AT	6	34942
29	AT	5	36030
30	T	10	67462
31	T	13	66246
32	T	10	62738
33	T	10	62727
34	AATG	3	45257
35	AT	6	46162
36	T	10	59614
37	A	10	46306
38	T	10	57514
39	T	10	54308
40	T	11	52353
41	T	14	51692
42	T	10	51609
43	T	10	49563
44	T	10	48847
45	T	10	47117
46	T	10	44011
47	T	10	43265
48	A	10	64020
49	A	10	65966
50	T	12	36522
51	T	11	31156
52	ATCT	3	31023
53	T	13	30753
54	A	10	76464
55	A	11	77591
56	T	10	27773
57	T	10	25423
58	T	11	22205
59	AT	6	84442
60	AT	5	85279
61	AT	5	86936
62	T	11	18198
63	T	13	17665
64	T	12	17492
65	A	10	89140
66	ACTT	3	14512
67	T	11	13314
68	ACCT	3	92550
69	T	10	12544
70	T	10	11884
71	A	12	98450
72	T	10	6899
73	A	10	101348
74	AT	6	101613
75	ATTT	3	4132
76	T	10	1720
77	A	12	104303
78	A	10	105197
